# Supplementary material for: N, P co-doping triggered phase transition of MoS2 with enlarged interlayer spacing for efficient hydrogen evolution
Source: Royal Society of Chemistry journal article supplement (doi:10.1039/d2nj02551e), 2022-01-01
Supplement: d2nj02551e1.pdf [file d2nj02551e1.pdf]

Supplementary Materials

## N, P co-doping triggered phase transition of MoS<sub>2</sub> with enlarged interlayer spacing for efficient hydrogen evolution

Ailing Feng<sup>a</sup>, Shijiu Ding<sup>a</sup>, Peitao Liu<sup>\*,a</sup>, Yanqing Zu<sup>a</sup>, Fengbo Han<sup>a</sup>, Xiaodong Li<sup>a</sup>, Liang Liu<sup>a</sup> and Yanan Chen<sup>a</sup>

<sup>a</sup> Institute of Physics & Optoelectronics Technology, Baoji University of Arts and Sciences, Baoji, 721016, China

Corresponding author: Tel: 0917-3627689; E-mail: liupt@bjwlxy.edu.cn

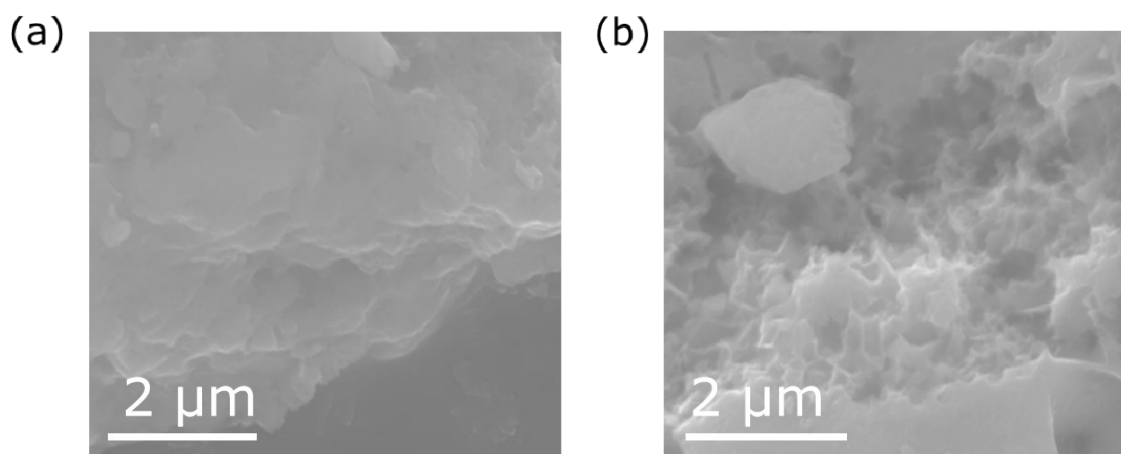

**Figure S1.** (a) SEM results of N-MoS<sub>2</sub> and (b) N, P co-doped MoS<sub>2</sub> nanosheet.

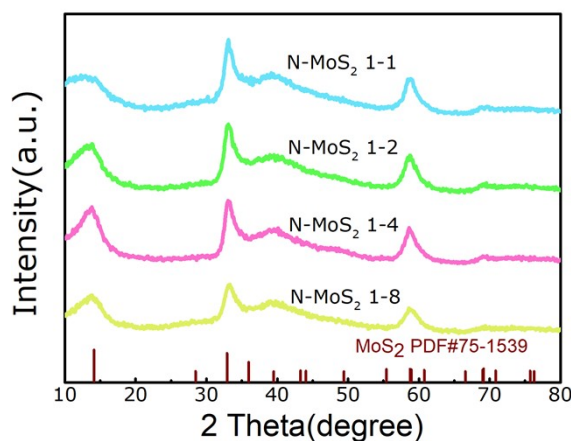

**Figure S2.** XRD results of N-MoS<sub>2</sub> 1-1, N-MoS<sub>2</sub> 1-2, N-MoS<sub>2</sub> 1-4 and N-MoS<sub>2</sub> 1-8.

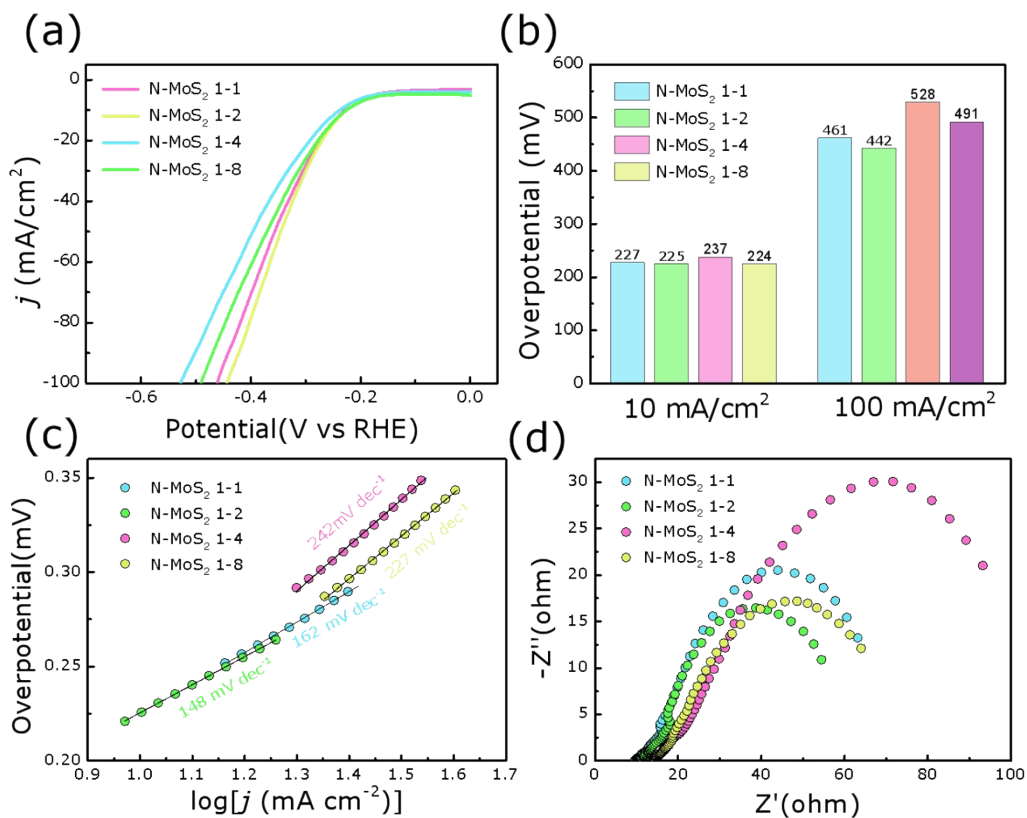

**Figure S3.** Electrochemical Test Diagram of N-MoS<sub>2</sub>. (a) The LSV curves, (b) the overpotential, (c) the corresponding Tafel slope, and (d) the electrochemical impedance of N-MoS<sub>2</sub> 1-1, N-MoS<sub>2</sub> 1-2, N-MoS<sub>2</sub> 1-4 and N-MoS<sub>2</sub> 1-8.

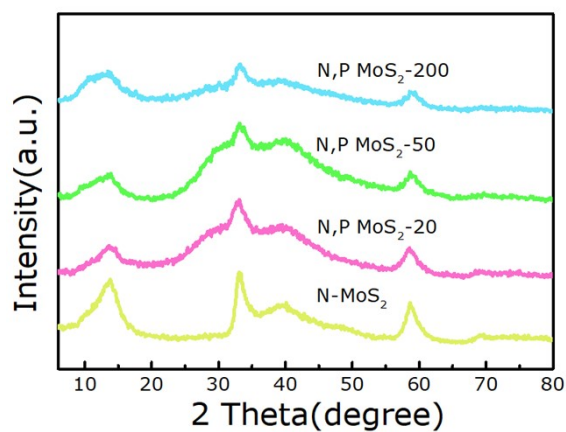

**Figure S4.** XRD results of N-MoS<sub>2</sub>, N, P-MoS<sub>2</sub>-20, N, P-MoS<sub>2</sub>-50 and N, P-MoS<sub>2</sub>-200.

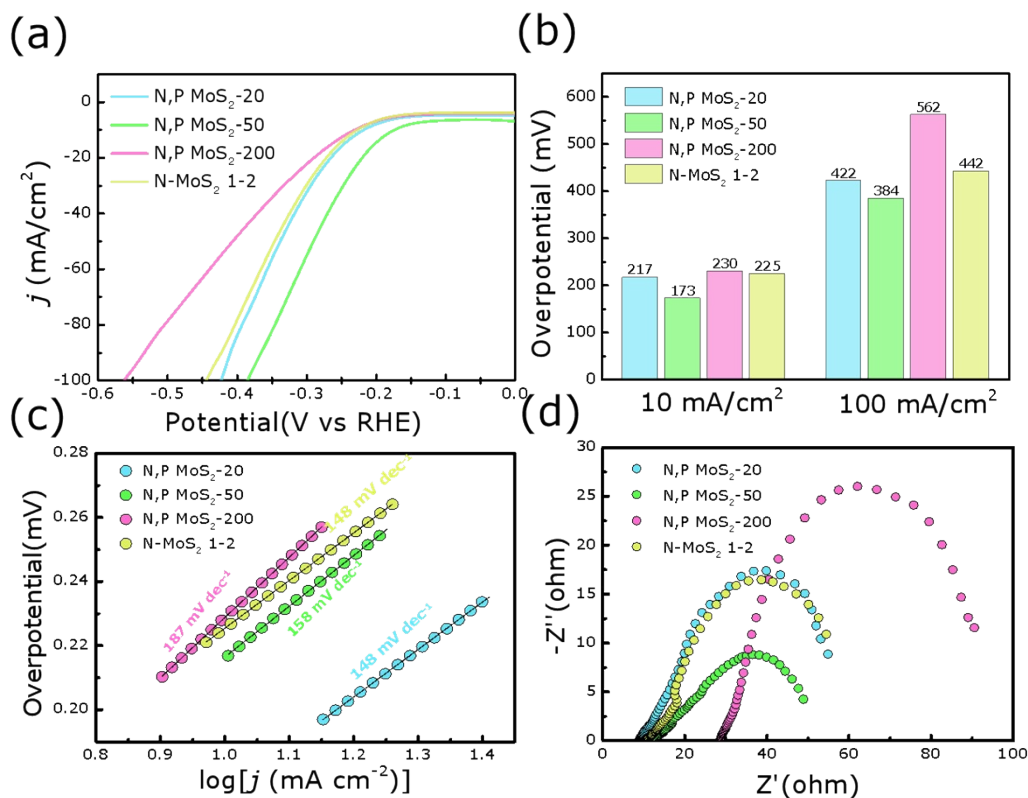

**Figure S5.** Electrochemical Test Diagram of N, P-MoS<sub>2</sub>. (a) The LSV curves, (b) the overpotential, (c) the corresponding Tafel slope, and (d) the electrochemical impedance of N-MoS<sub>2</sub> 1-2, N, P-MoS<sub>2</sub>-20, N, P-MoS<sub>2</sub>-50, N, P-MoS<sub>2</sub>-200.

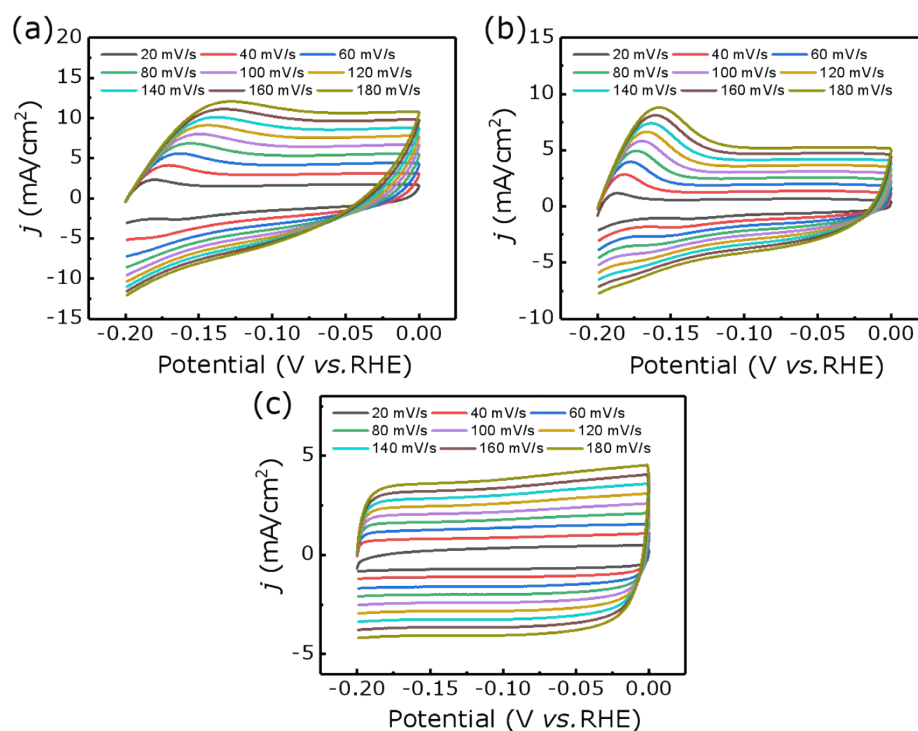

**Figure S6.** Electrochemical capacitance measurements were performed to determine the ECSA of (a) Pt/C, (b) N, P-MoS<sub>2</sub> and (c) N-MoS<sub>2</sub>.

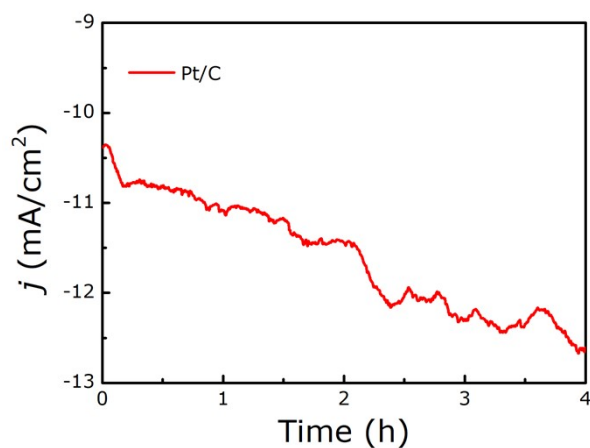

**Figure S7.** *i-t* curves of commercial Pt/C.

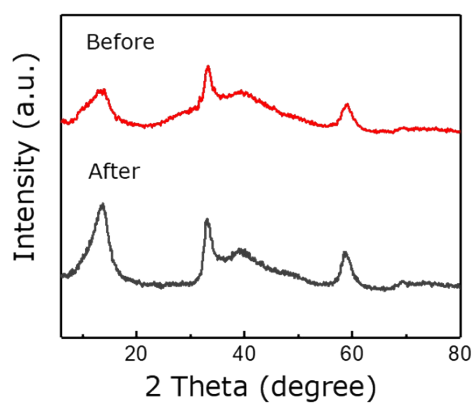

**Figure S8.** The XRD results for the N, P-MoS<sub>2</sub> before and after HER activity.

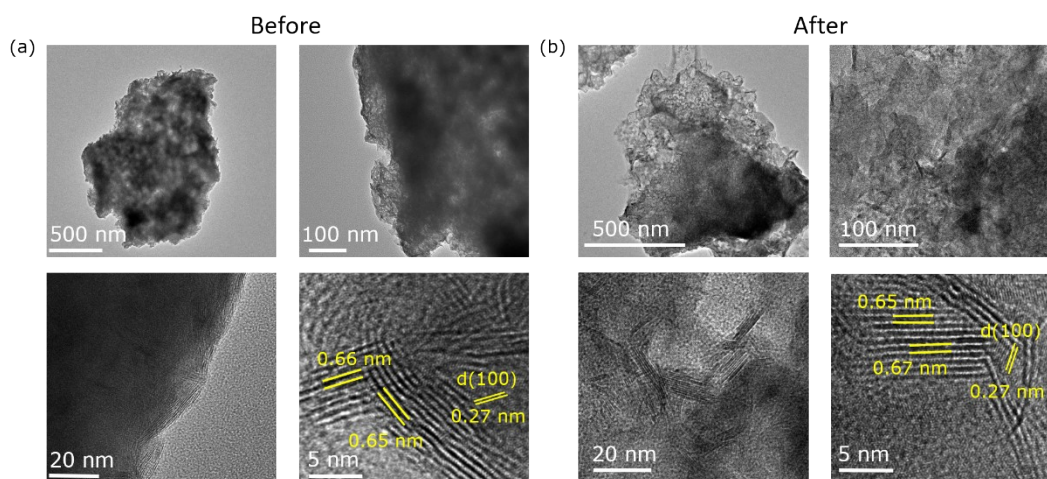

**Figure S9.** (a)-(b) The TEM and HRTEM results for the N, P-MoS<sub>2</sub> before and after HER activity.

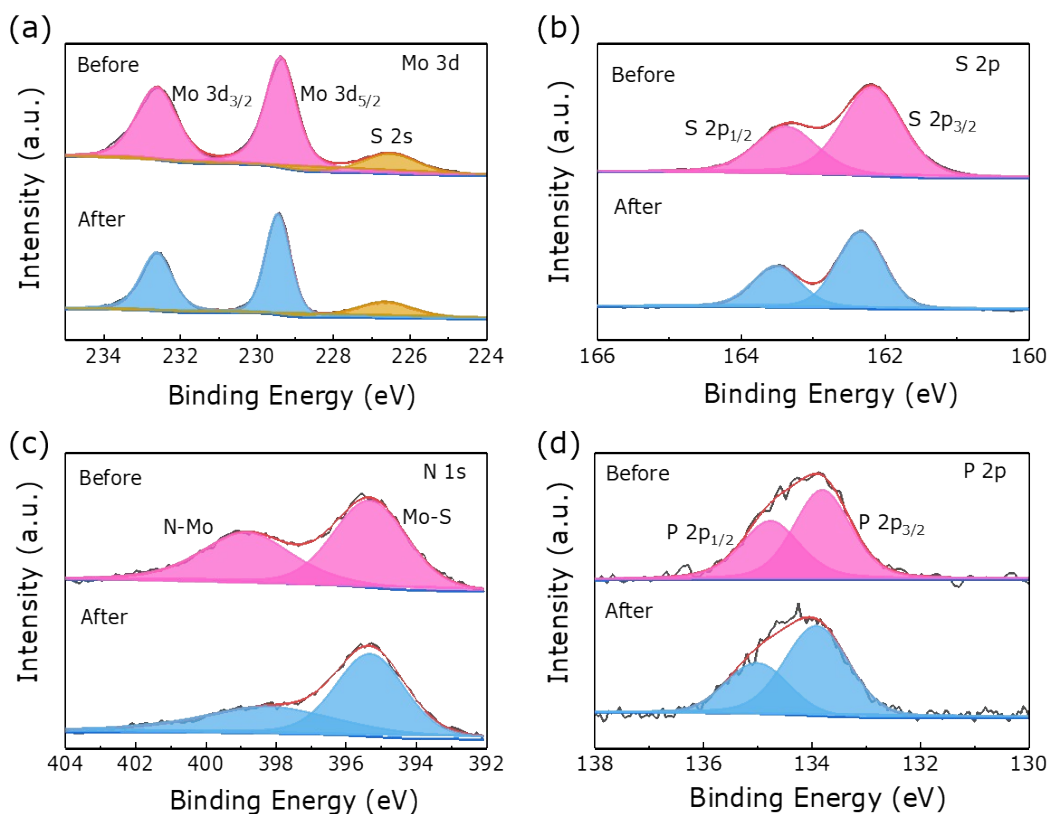

**Figure S10.** (a) The Mo 3d XPS spectrum, (b) S 2p XPS spectrum, (c) N 1s XPS, and (f) P 2p XPS spectrum of the N, P-MoS<sub>2</sub> before and after HER activity.

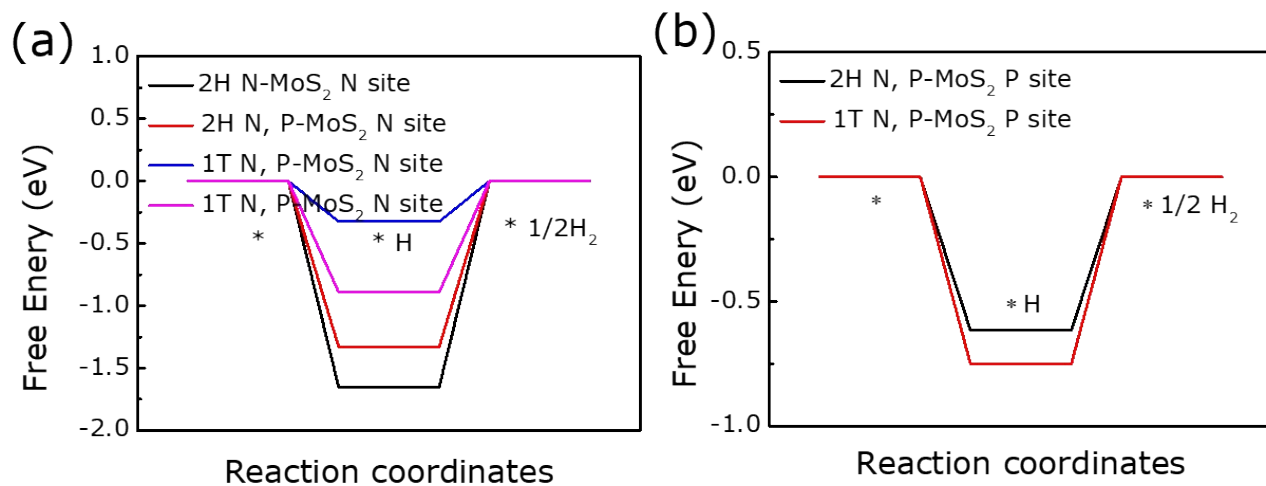

**Figure S11.** (a) The free energy diagram for HER on 2H N-MoS<sub>2</sub>, 2H N, P-MoS<sub>2</sub>, 1T N-MoS<sub>2</sub>, and 1T N, P-MoS<sub>2</sub> N sites, respectively. (b) The free energy diagram for HER on 2H N, P-MoS<sub>2</sub> and 1T N, P-MoS<sub>2</sub> P sites, respectively.

**Table S1.** Comparison of the HER performances of N, P-MoS<sub>2</sub> with some of the previously reported MoS<sub>2</sub>-based catalysts.

| Catalyst                                               | Electrolytes                         | Potential | $\eta$                | Reference |
|--------------------------------------------------------|--------------------------------------|-----------|-----------------------|-----------|
| N, P-MoS <sub>2</sub>                                  | 0.5 M H <sub>2</sub> SO <sub>4</sub> | 179 mV    | 10 mA/cm <sup>2</sup> | This work |
| MoS <sub>2</sub> /graphite                             | 0.5 M H <sub>2</sub> SO <sub>4</sub> | 183 mV    | 10 mA/cm <sup>2</sup> | [1]       |
| Zn@MoS <sub>2</sub>                                    | 0.5 M H <sub>2</sub> SO <sub>4</sub> | 194 mV    | 10 mA/cm <sup>2</sup> | [2]       |
| 1T/2H-MoS <sub>2</sub> nanosheets                      | 0.5 M H <sub>2</sub> SO <sub>4</sub> | 220 mV    | 10 mA/cm <sup>2</sup> | [3]       |
| Monolayer MoS <sub>2</sub>                             | 0.5 M H <sub>2</sub> SO <sub>4</sub> | 160 mV    | 10 mA/cm <sup>2</sup> | [4]       |
| 1T-MoS <sub>2</sub> ultra-thin flakes                  | 0.5 M H <sub>2</sub> SO <sub>4</sub> | 254 mV    | 10 mA/cm <sup>2</sup> | [5]       |
| EA-2H/1T/RGO                                           | 0.5 M H <sub>2</sub> SO <sub>4</sub> | 186 mV    | 10 mA/cm <sup>2</sup> | [6]       |
| O-MoS <sub>2</sub> /G                                  | 0.5 M H <sub>2</sub> SO <sub>4</sub> | 200 mV    | 20 mA/cm <sup>2</sup> | [7]       |
| O, P-MoS <sub>2</sub>                                  | 0.5 M H <sub>2</sub> SO <sub>4</sub> | 277 mV    | 50 mA/cm <sup>2</sup> | [8]       |
| Co <sub>9</sub> S <sub>8</sub> /NC@MoS <sub>2</sub>    | 1 M PBS                              | 261 mV    | 10 mA/cm <sup>2</sup> | [9]       |
| MoP                                                    | 1 M PBS                              | 187 mV    | 10 mA/cm <sup>2</sup> | [10]      |
| Co <sub>9</sub> S <sub>8</sub> @MoS <sub>2</sub> /CNFs | 0.5 M H <sub>2</sub> SO <sub>4</sub> | 190 mV    | 10 mA/cm <sup>2</sup> | [11]      |

## Notes and references

1. C. C. Cheng, A. Y. Lu, C. C. Tseng, X. Yang, M. N. Hedhili, M. C. Chen, L. J. Li, *Nano Energy*, 2016, **30**, 846-852.
2. W. Wu, C. Niu, C. Wei, Y. Jia, C. Li, Q. Xu, *Angew. Chem. Int. Edit.*, 2019, **58**, 2029-2033.
3. Z. Liu, Z. Gao, Y. Liu, M. Xia, R. Wang, N. Li, *ACS Appl. Mater. Inter.*, 2017, **9**, 25291-25297.
4. Y. Xu, L. Wang, X. Liu, S. Zhang, C. Liu, D. Yan, S. Luo, *J. Mater. Chem. A*, 2016, **4**, 16524-16530.

5. F. Yang, Z. F. Cao, J. Wang, S. Wang, H. Zhong, *Int. J. Hydrogen. Energ.*, 2019, **44**, 21229-21237.
6. K. Zhang, B. Jin, Y. Gao, S. Zhang, H. Shin, H. Zeng, J. H. Park, *Small*, 2019, **15**, 1804903.
7. J. Guo, F. Li, Y. Sun, X. Zhang, L. Tang, *J. Power Sources*, 2015, **291**, 195-200.
8. J. Liu, Z. Wang, J. Li, L. Cao, Z. Lu, D. Zhu, *Small*, 2020, **16**, 1905738.
9. H. Li, X. Qian, C. Xu, S. Huang, C. Zhu, X. Jiang, L. Hou, *ACS Appl. Mater. Inter.* , 2017, **9**, 28394-28405.
10. B. Kim, T. Kim, K. Lee, J. Li, *ChemElectroChem*, 2020, **7**, 3578-3589.
11. H. Zhu, J. Zhang, R. Y. zhang, M. Du, Q. Wang, G. Gao, X. Zhang, *Adv. Mater.*, 2015, **27**, 4752-4759.
